# Supplementary material for: A nonenzymatic reduced graphene oxide-based nanosensor for parathion
Source: publisher site journal article supplement (doi:10.3762/bjnano.13.65), 2022-07-28
Supplement: Additional file 1 [file 2190-4286-13-65-S1.pdf]

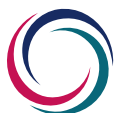

## Supporting Information

for

### **A nonenzymatic reduced graphene oxide-based nanosensor for parathion**

Sarani Sen, Anurag Roy, Ambarish Sanyal and Parukuttyamma Sujatha Devi

*Beilstein J. Nanotechnol.* **2022**, *13*, 730–744. [doi:10.3762/bjnano.13.65](https://doi.org/10.3762/bjnano.13.65)

## Additional figures and tables

**Table S1:** Chemical sample table indicating corresponding CAS, supplier and other details.

| <b>Component</b>                                   | <b>CAS Number</b> | <b>Supplier</b>                                                     | <b>Features</b>                                                         |
|----------------------------------------------------|-------------------|---------------------------------------------------------------------|-------------------------------------------------------------------------|
| Parathion<br>PESTANAL                              | 56-38-2           | Merck, India<br><br>(45607)                                         | Molecular Weight: 291.26<br><br>Analytical Standard                     |
| Graphite Powder                                    | 7782-42-5         | Thermo Fisher Scientific -<br><br>Fisher Chemicals<br><br>(G090060) | Molecular Weight (g/mol)<br>12.011<br><br>99% Pure                      |
| Sulfuric Acid                                      | 7664-93-9         | Thermo Fisher Scientific -<br><br>Qualigens<br><br>(Q37365)         | N/50 Solution                                                           |
| Nitric Acid                                        | 7697-37-2         | Thermo Fisher Scientific -<br><br>Qualigens<br><br>(Q29195)         | 1.42 (70%)<br><br>Product Grade: SQ, ER                                 |
| Hydrogen<br>Peroxide                               | 7722-84-1         | Thermo Fisher Scientific -<br><br>Qualigens<br><br>(Q15465)         | 30%<br><br>Product Grade: SQ, ER                                        |
| Sodium<br>Dihydrogen<br>Phosphate<br><br>Dihydrate | 13472-35-0        | Merck, India<br><br>SKU: 1063420250                                 | Molecular Weight:<br><br>156.01<br><br>analysis EMSURE®                 |
| Sodium Acetate<br>Buffer                           | 126-96-5          | Merck, India<br><br>SKU: S7899                                      | pH 5.2 ± 0.1 (25 °C), for<br>molecular biology, 3 M,<br>0.2 µm filtered |

**Table S2:** Experimental sample table for composition analysis using binding energies of GO and RGO obtained by XPS.

| Sample | C 1s                  |                       |                       |                      | O 1s                  |                       |                      |
|--------|-----------------------|-----------------------|-----------------------|----------------------|-----------------------|-----------------------|----------------------|
|        | C–OH                  | C–C                   | C–O–C                 | C=O                  | –C=O                  | C–OH                  | –OH                  |
| GO     | 284.69 eV<br>(30.9 %) | 284.84 eV<br>(31.2 %) | 286.65 eV<br>(29.2 %) | 288.21 eV<br>(8.6 %) | 531.38 eV<br>(25.9 %) | 532.51 eV<br>(65.7 %) | 533.21 eV<br>(8.4 %) |
| ERGO   | 284.73 eV<br>(35.1 %) | 285.96 eV<br>(15.9 %) | 292.92 eV<br>(32.3 %) |                      | 531.30 eV<br>(34.9 %) | 532.86 eV<br>(55.9 %) | 536.22 eV<br>(9.2 %) |

**Table S3:** Experimental sample table for modified glassy carbon electrode electrochemical characteristics.

| Sample   | $R_s$ ( $\Omega$ ) | $R_{ct}$ ( $\Omega$ ) | Cdl (F)  | $W$ [ $\Omega \cdot \text{sqrt}(\text{Hz})$ ] <sup>-1</sup> |
|----------|--------------------|-----------------------|----------|-------------------------------------------------------------|
| Bare GCE | 0.0872             | 4.692                 | 1.96E-04 | 0.06072                                                     |
| GO/GCE   | 0.7326             | 6.938                 | 1.06E-02 | 0.06176                                                     |
| ERGO/GCE | 0.6013             | 1.618                 | 1.96E-02 | 0.08136                                                     |

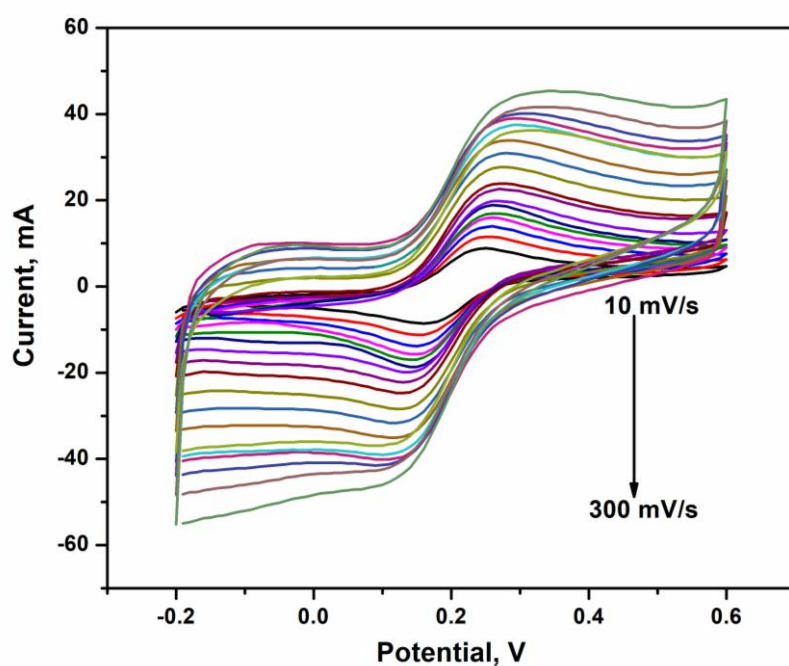

**Figure S1:** Cyclic voltammograms of ERGO/GCE at different scan rates (10–300 mV/s) in 1.0 mM  $K_3Fe(CN)_6$  solution with 1 M KCl.

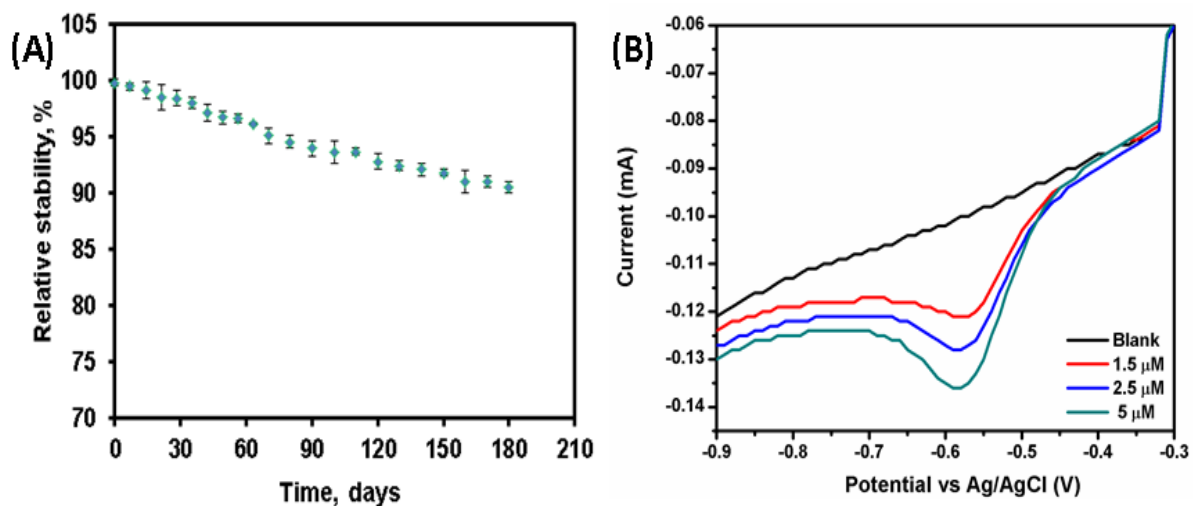

**Figure S2:** (A) Storage stability of the proposed sensing matrix (ERGO/GCE). (B) SWV of PT (1.5, 2.5, 5 μM) added in groundwater.

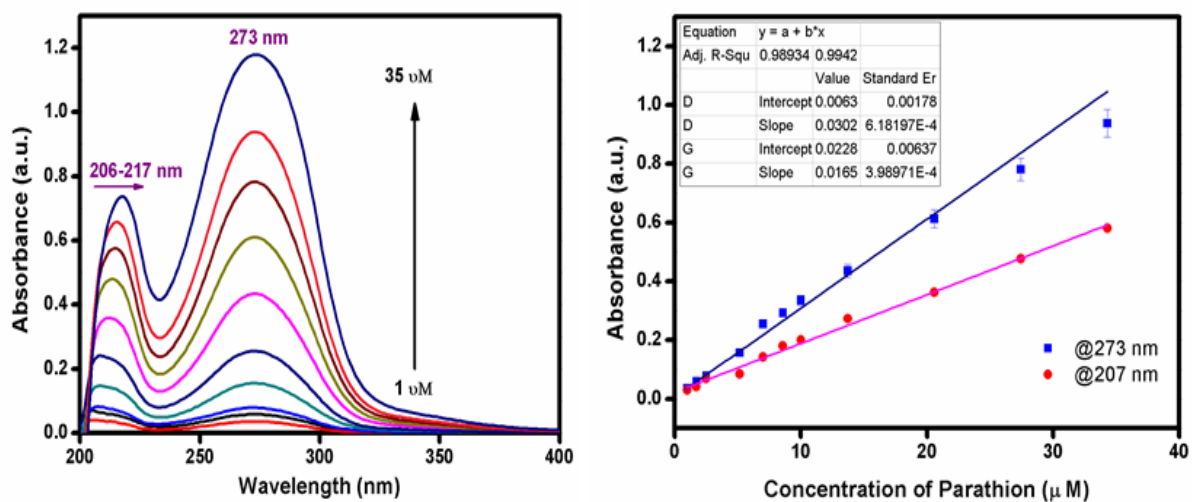

**Figure S3:** (A) Absorption spectra of parathion and (B) corresponding calibration plot.
